# Supplementary material for: O-Polysaccharides of LPS Modulate E. coli Uptake by Acanthamoeba castellanii
Source: MDPI journal article supplement (doi:10.3390/microorganisms11061377), 2023-05-24
Supplement: s1 [file s1]

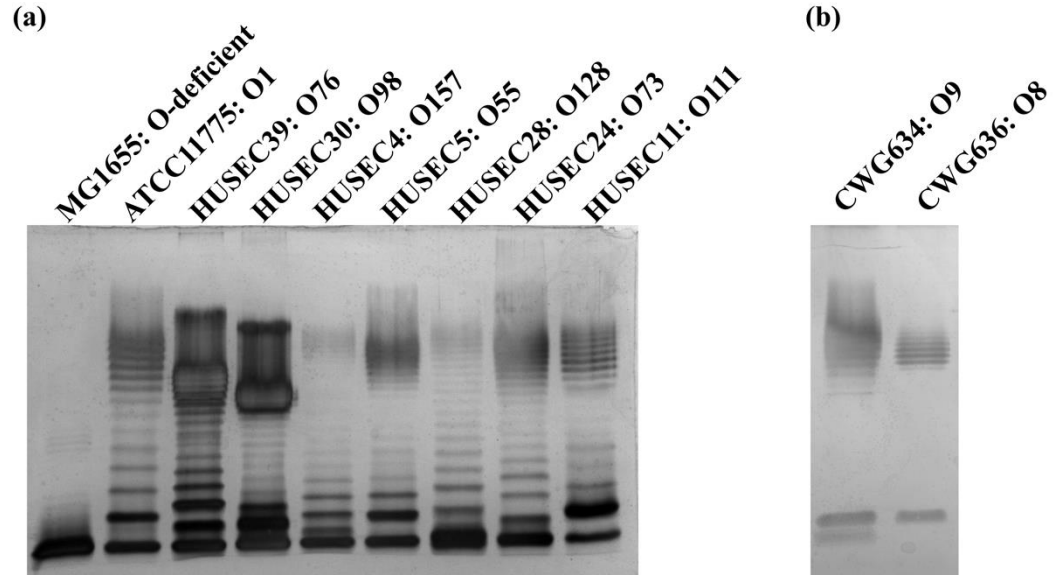

**Figure S1.** (a) LPS was extracted using hot phenol from *E. coli* strains MG1655, ATCC11775, HUSEC39, HUSEC30, HUSEC4, HUSEC5, HUSEC28, HUSEC24, HUSEC11. Purified LPS was visualized on 13% SDS-PAGE followed by silver staining. (b) LPS was extracted using hot phenol from *E. coli* strains CWG634 and CWG636 in LB supplemented with 0.04% Mannose. Purified LPS was visualized on 14% SDS-PAGE followed by silver staining.
